# Supplementary material for: Vortex-assisted, nanoarchitectonic manipulation of microparticles with flavonoid-Fe3+complex in biphasic water–oil systems
Source: Royal Society of Chemistry journal article supplement (doi:10.1039/d3cc00812f), 2023-01-01
Supplement: d3cc00812f1.pdf [file d3cc00812f1.pdf]

## Electronic Supplementary Information

### Vortex-Assisted, Nanoarchitectonic Manipulation of Microparticles with Flavonoid-Fe<sup>3+</sup> Complex in Biphasic Water-Oil Systems

*Duc Tai Nguyen,<sup>a</sup> Sang Yeong Han,<sup>a</sup> Gyeongwon Yun,<sup>a</sup> Hojae Lee,<sup>\*b</sup> and Insung S. Choi<sup>\*a</sup>*

<sup>a</sup> Department of Chemistry, KAIST, Daejeon 34141, Korea

<sup>b</sup> Department of Chemistry, Hallym University, Chuncheon 24252, Korea

#### Table of Contents

- Experimental.
- **Figure S1.** UV-Vis spectrum of LUT.
- **Figure S2.** XPS, UV-Vis, and  $\zeta$ -potential data of PS@LUT-Fe<sup>3+</sup>, and EDX and FT-IR spectrum of LUT-Fe<sup>3+</sup> capsules.
- **Figure S3.** FE-SEM images and XPS spectra of various PS@flavonoid-Fe<sup>3+</sup>.
- **Figure S4.** UV-Vis spectra of water and 1-octanol phases with varied  $\chi_{\text{Fe}}$ .
- **Figure S5.** Control experiment with use of 1-octanol only.
- **Figure S6.** (a) AFM images and (b) time-lapse shell thicknesses of LUT-Fe<sup>3+</sup> capsules for various  $r$  values.
- **Figure S7.** AFM images and permeability of LUT-Fe<sup>3+</sup> capsules with different concentrations of LUT and Fe<sup>3+</sup>.

## Experimental

**Materials.** Luteolin (LUT, 98%, TCI), quercetin (QUE, 95%, Sigma-Aldrich), naringenin (NAR, 93%, TCI), (+)-catechin hydrate (CAT, 98%, Sigma-Aldrich), myricetin (MYR, 97%, TCI), iron(III) chloride hexahydrate ( $\text{FeCl}_3 \cdot 6\text{H}_2\text{O}$ ,  $\geq 98.0\%$ , Sigma), 1-octanol (ACS reagent, 99%, Sigma-Aldrich), Alexa Fluor 488-conjugated albumin from bovine serum (BSA-Alexa 488, Invitrogen), polystyrene microparticle (PS, diameter: 3.97  $\mu\text{m}$ , Microparticles GmbH), ethanol (absolute for analysis, Supelco), tetrahydrofuran (THF, HPLC grade, Junsei), hydrochloric acid (HCl, 37%, Daejung), and fluorescein isothiocyanate-dextran (FITC-dextran, average MW: 20, 40, 150, 250, 500, and 2000 kDa, Sigma-Aldrich) were used as received. Deionized (DI) water (18.3  $\text{M}\Omega\text{-cm}$ ) from Milli-Q Direct 8 (Millipore) was used.

**Synthesis of PS@LUT- $\text{Fe}^{3+}$  and Hollow Capsules.** To 5 mL of an aqueous suspension of  $\text{FeCl}_3$  and PS particles (0.3% w/v) was added 5 mL of a 1-octanol solution of LUT, with predetermined concentrations of  $\text{Fe}^{3+}$  and LUT. The mixture was stirred at 800 rpm at room temperature, transferred to a microtube, and centrifuged at 6000 g for 1 min to collect PS@LUT- $\text{Fe}^{3+}$ . For the formation of hollow capsules, PS@LUT- $\text{Fe}^{3+}$  in THF (1 mL) was vortexed for 1 min and centrifuged at 2000 g for 1 min, and the supernatant was removed. After repeating the process three times, THF was added, and the suspension was incubated for 3 h for PS removal. For permeability test, 100  $\mu\text{L}$  of a FITC-dextran solution (1 mg/mL) was added to the capsule suspension. The mixture was placed on a rotator and incubated at room temperature for 10 min, after which it was immediately analyzed for at least 100 capsules by confocal laser-scanning microscopy (CLSM).

**Characterizations.** Field-emission scanning electron microscopy (FE-SEM) imaging was performed with an FEI Inspect F50 microscope (FEI) with an accelerating voltage of 5 kV, after sputter-coating with platinum. The  $\zeta$ -potential was measured with a Zetasizer Nano ZS (Malvern). Transmission electron microscopy (TEM) imaging and energy-dispersive X-ray (EDX) spectroscopy elemental analysis were conducted with a Talos F200X (FEI) with a carbon-support-film copper mesh, and CLSM imaging was performed with an LSM 700 (Carl Zeiss). Atomic force microscopy (AFM) images were taken in the QI mode with a NanoWizard4 BioAFM (JPK). X-ray photoelectron spectroscopy (XPS) spectra were obtained with a Sigma Probe (Thermo VG Scientific), and UV-Vis absorbance was measured with a SpectraMax iD5 microplate reader (Molecular Devices) in a 96-well plate (UVmax, SPL Life Science). Fourier-transform infrared (FT-IR) spectrum was obtained with an FT-IR spectrophotometer (Nexus 670, Thermo Nicolet).

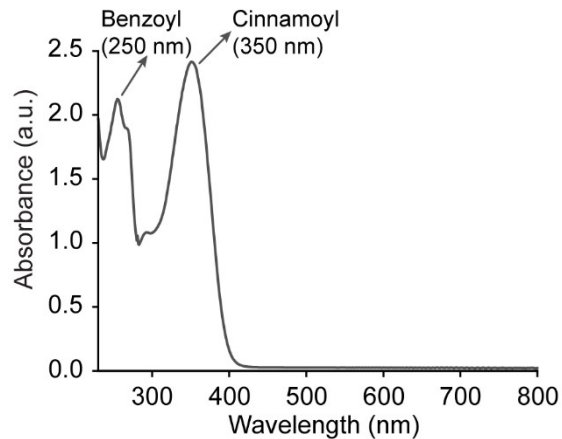

**Figure S1.** UV-Vis spectrum of LUT in water/ethanol (1/20 v/v).

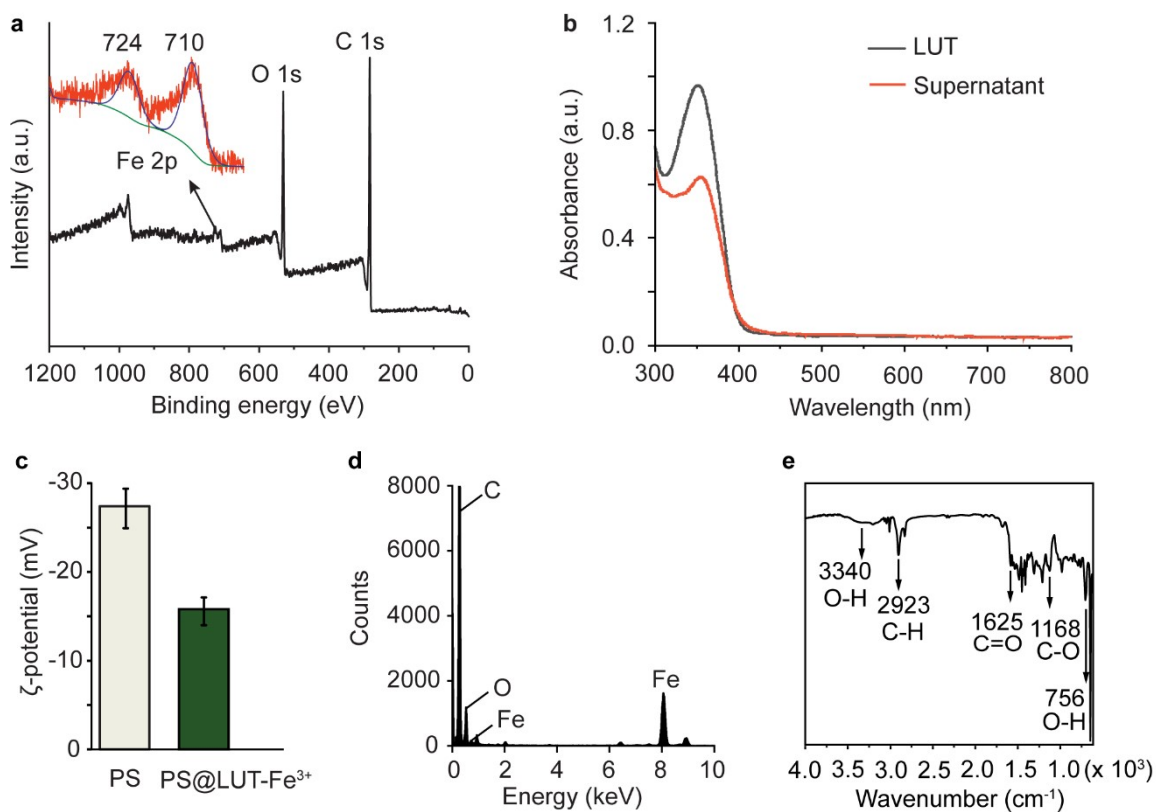

**Figure S2.** (a) XPS spectra of PS@LUT-Fe<sup>3+</sup>. (b) UV-Vis spectra of (black) LUT and (red) supernatant after shell degradation of PS@LUT-Fe<sup>3+</sup>. (c)  $\zeta$ -potentials of PS and PS@LUT-Fe<sup>3+</sup>. (d) EDX spectrum of LUT-Fe<sup>3+</sup> capsules. (e) FT-IR spectrum of LUT-Fe<sup>3+</sup> capsules.

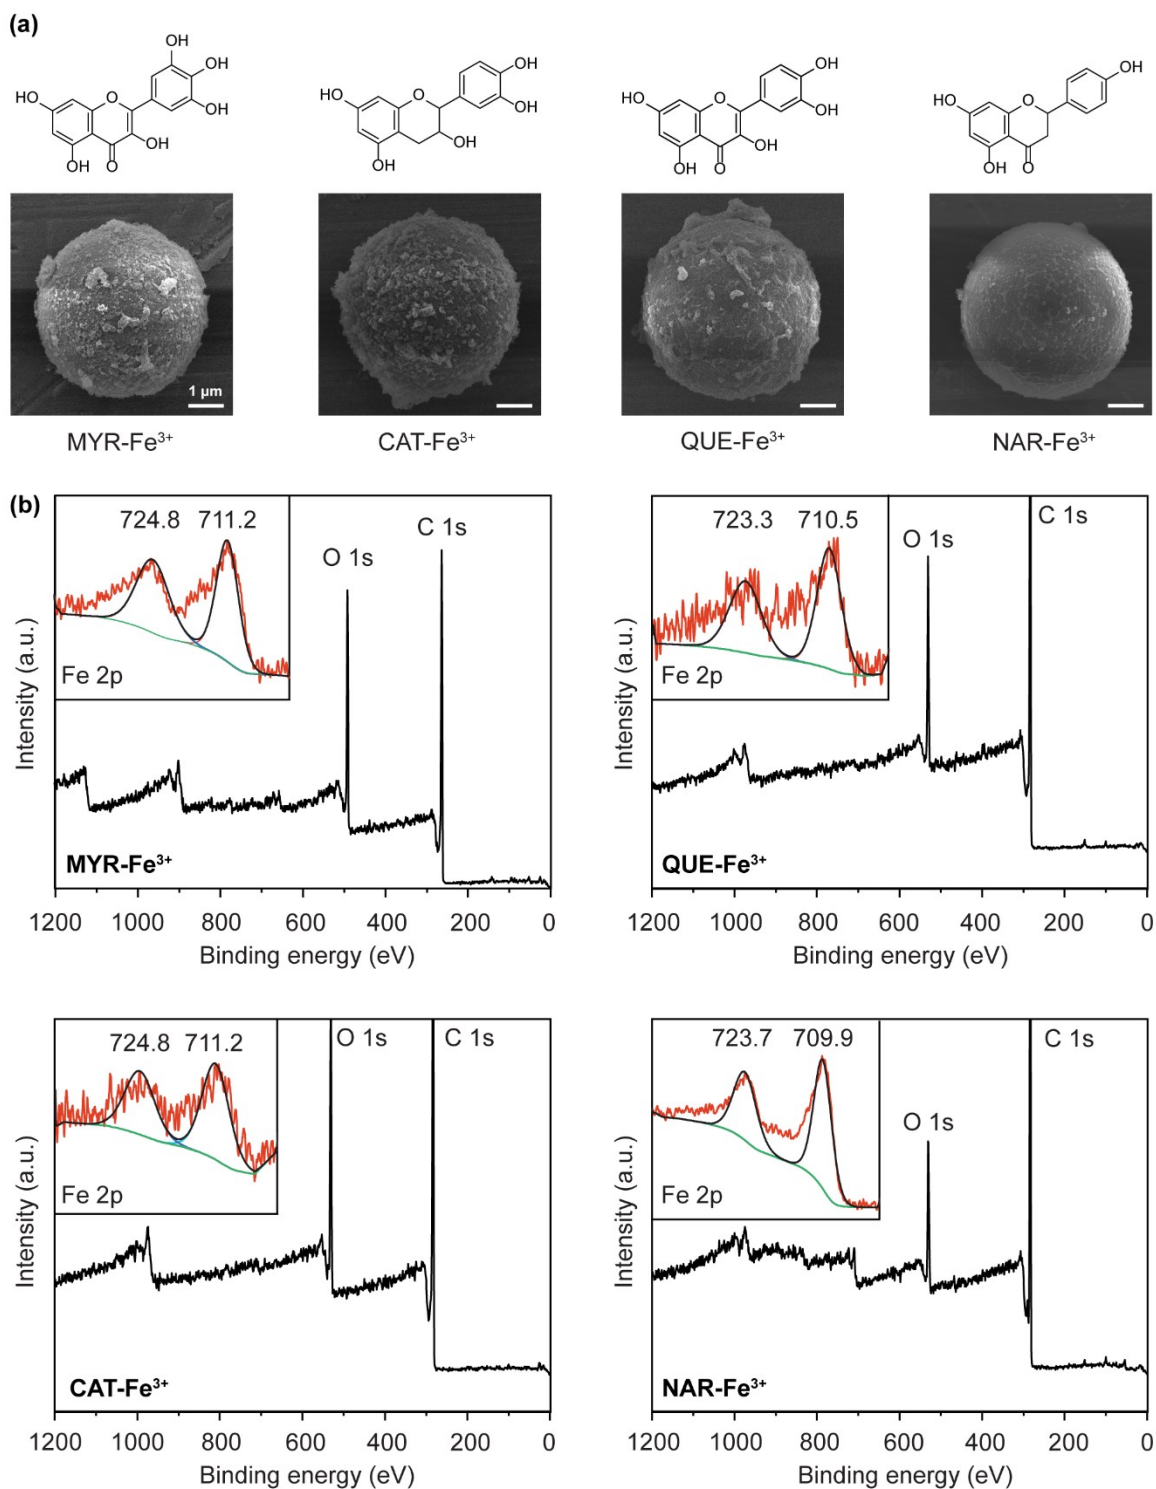

**Figure S3.** (a) FE-SEM images of PS@flavonoid-Fe<sup>3+</sup>. (b) XPS spectra of PS@flavonoid-Fe<sup>3+</sup>. MYR: myricetin; QUE: quercetin; CAT: catechin; and NAR: naringenin.

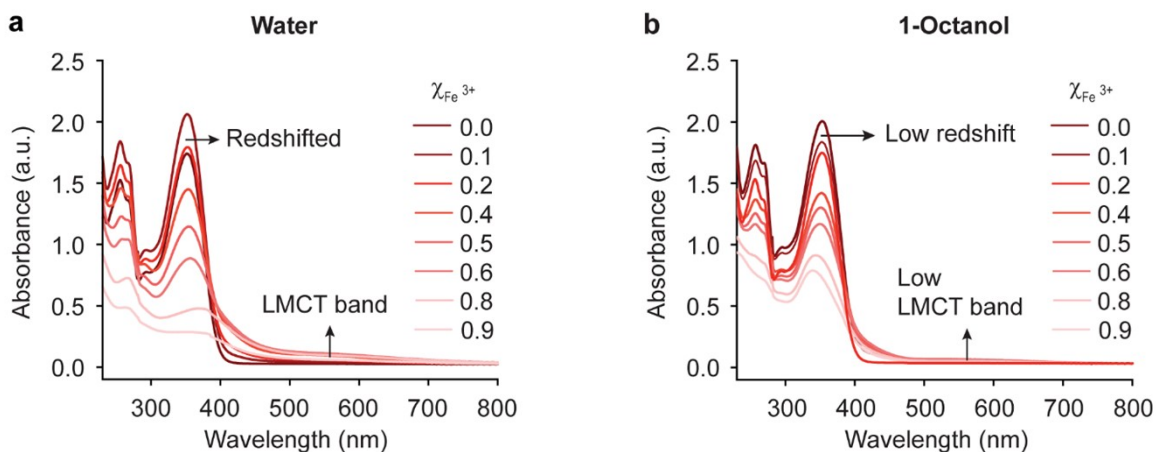

**Figure S4.** UV-Vis spectra of solutions containing LUT and  $\text{Fe}^{3+}$  with varied  $\chi_{\text{Fe}^{3+}}$ : (a) water and (b) 1-octanol phases.

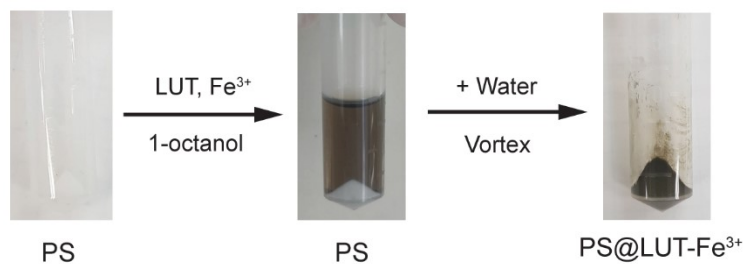

**Figure S5.** Control experiment with use of 1-octanol only. The white PS particles in the middle image indicate no shell formation, while the brownish color in the right image indicates the formation of  $\text{LUT-Fe}^{3+}$  shells on the PS particles after the addition of water and vortexing.

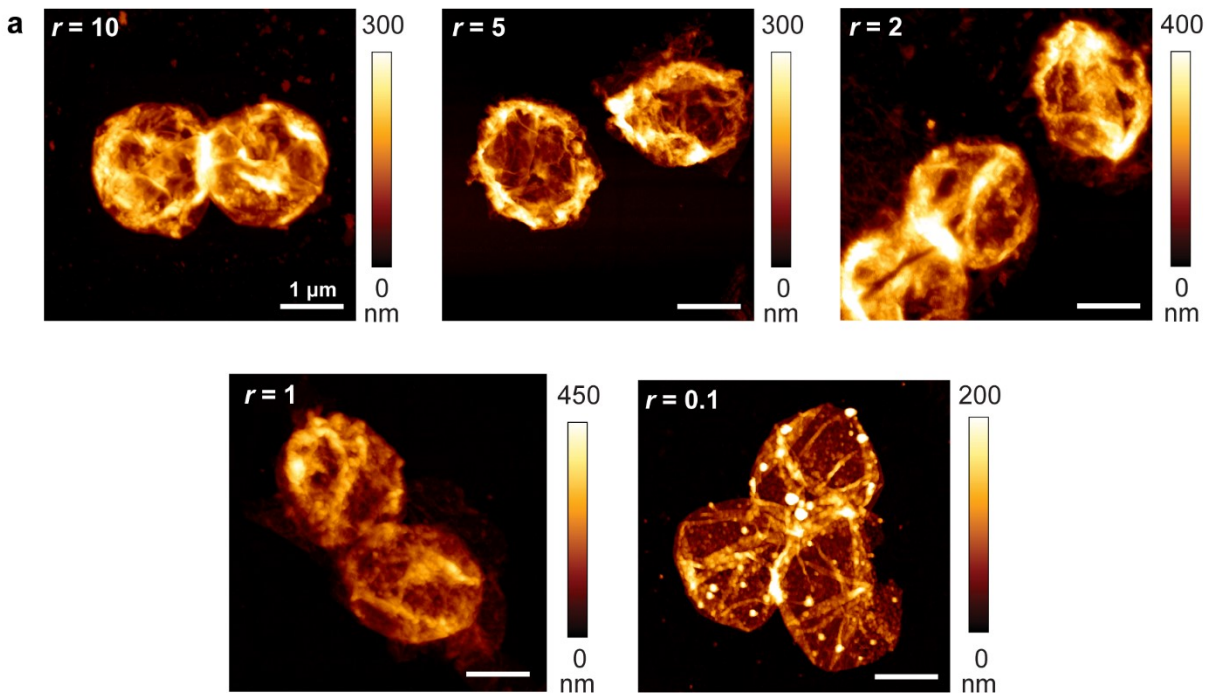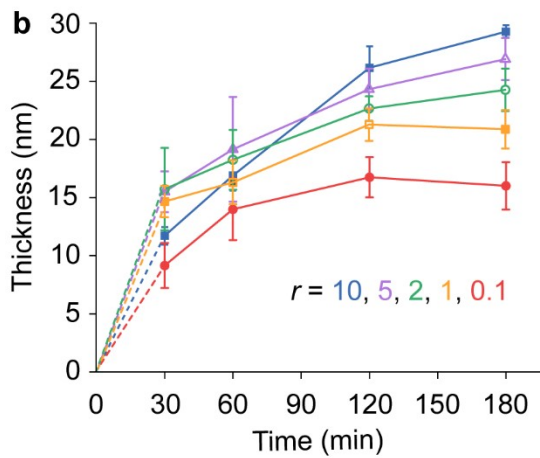

**Figure S6.** (a) AFM images of LUT-Fe<sup>3+</sup> capsules for various  $r$  values, after 3 h of reaction. (b) Time-lapse shell thicknesses of LUT-Fe<sup>3+</sup> capsules for various  $r$  values.  $r = 0.1, 1, 2, 5, 10$ .

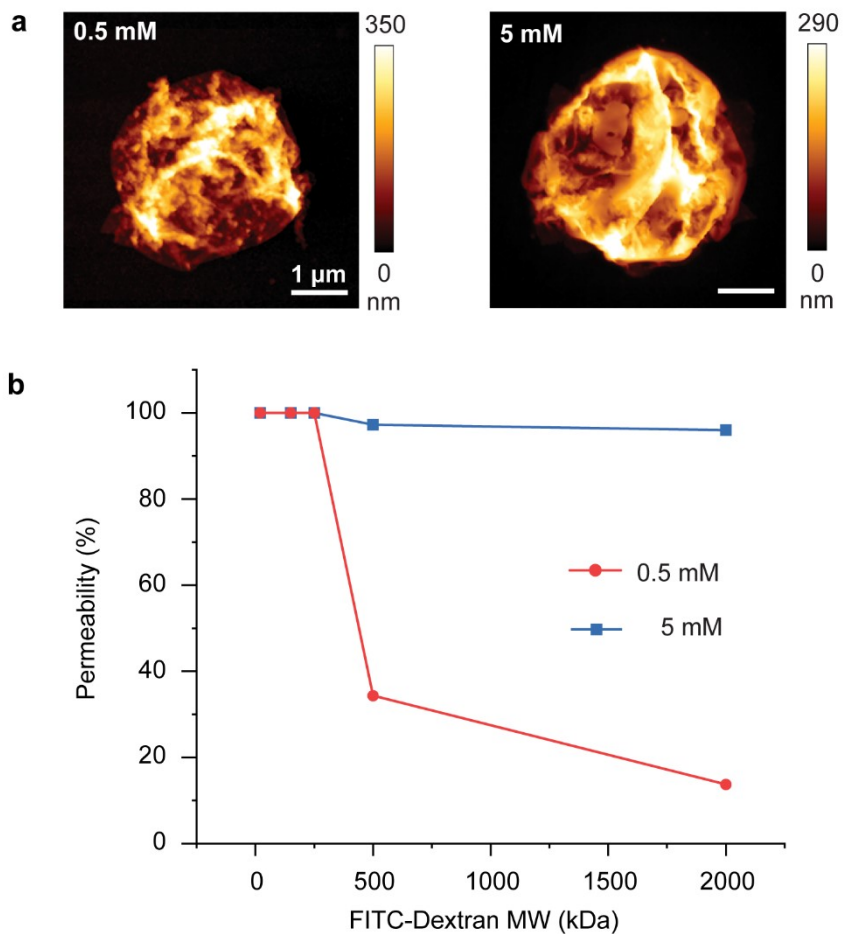

**Figure S7.** (a) AFM images of LUT-Fe<sup>3+</sup> capsules prepared with (left) [LUT] = [Fe<sup>3+</sup>] = 0.5 mM and (right) [LUT] = [Fe<sup>3+</sup>] = 5 mM. (b) Permeability of LUT-Fe<sup>3+</sup> capsules for FITC-dextrans: (red) [LUT] = [Fe<sup>3+</sup>] = 0.5 mM and (blue) [LUT] = [Fe<sup>3+</sup>] = 5 mM.
